# Supplementary material for: MATN4 as a target gene of HIF-1α promotes the proliferation and metastasis of osteosarcoma
Source: publisher site journal article supplement (doi:10.18632/aging.205941), 2024-06-17
Supplement: Supplementary file [file aging-v16-205941-supplementary-material-SD1.pdf]

## SUPPLEMENTARY FIGURE

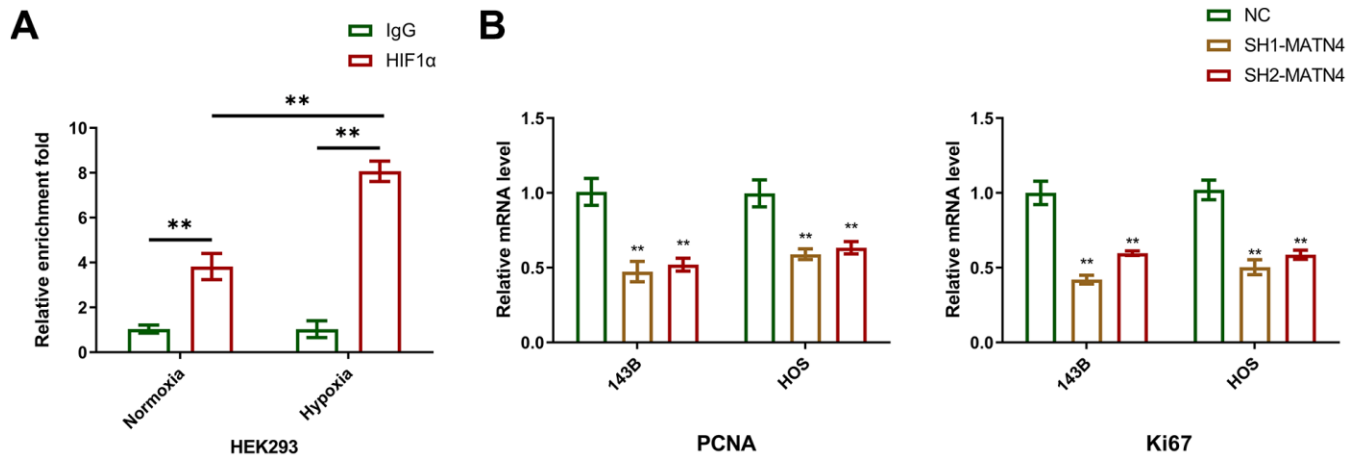

**Supplementary Figure 1.** (A) ChIP was conducted in HEK293 cells to confirm the regulatory interaction between MATN4 and HIF-1 $\alpha$  is not exclusive to osteosarcoma cells. (B) Following the downregulation of MATN4, the expression levels of PCNA and Ki67 in 143B and HOS cells were quantified using RT-qPCR.
